# Supplementary material
Source: publisher figshare collection journal article supplement (https://acs.figshare.com/ndownloader/files/5761884)
Supplement: Supplementary file 1 [file 5761884]

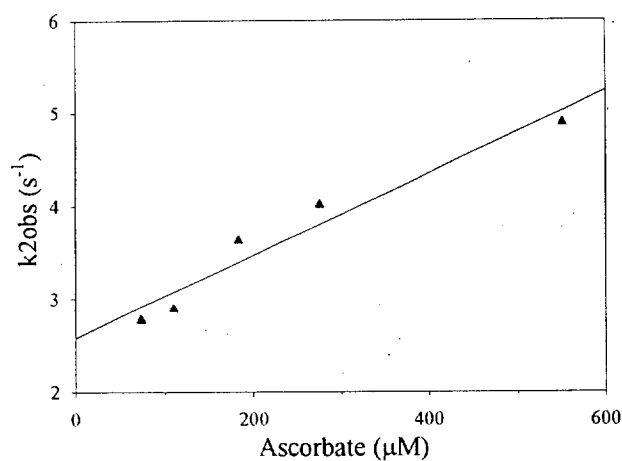

Figure S1. Relationship between the observed rate constants for the formation of the final product as measured by absorbance at 485 nm (This rate is equal to the rate of the decay of the intermediate as monitored by absorbance at 386 nm) as a function of ascorbate concentration.
